# Supplementary material
Source: PubMed Central journal article supplement (PMC3293644)
Supplement: supp_blood-2011-06-361691_Document1.pdf [file supp_blood-2011-06-361691_Document1.pdf]

**Table S1**

| <b>Inverse PCR primers for STAT5 site deletion</b> |                                         |
|----------------------------------------------------|-----------------------------------------|
| STAT5A site                                        | (F) 5'-pG TTCATAAACTTCACGTGTCAA-3'      |
|                                                    | (R) 5'-pATGTGATCAATATTATTGTTAGTAT-3'    |
| STAT5B site                                        | (F) 5'-pGGTGCAGAATGTGTAGGTTTG-3'        |
|                                                    | (R) 5'-pAAATTA AAAAAAAAAAATCTTTGAAGC-3' |
| <b>Primers for ChIP PCR analysis</b>               |                                         |
| STAT5A binding site                                | (F) 5'-GCATCTCTGACCTCTCAGCA-3'          |
|                                                    | (R) 5'-CAGAAACAAAATCCCAGCTTT-3'         |
| STAT5B binding site                                | (F) 5'-GGGATTGGTATGAAGGAACG-3'          |
|                                                    | (R) 5'-AGCGAAACTCCGTCTCAAAA-3'          |
| GAPDH control                                      | (F) 5'-TCTGGGGACTAGGGGAAGGA-3'          |
|                                                    | (R) 5'-CCGCAAGGAGAGCTCAAGGT-3'          |
| <b>Oligo sequences for shRNA</b>                   |                                         |
| SCR (scrambled)                                    | 5'-GCGCGCTTTGTAGGATTCG-3'               |
| shSIRT1-3                                          | 5'-GAAGTGCCTCAGATATTAA-3'               |
| shKU70-1                                           | 5'-GGGAAAGTTACCAAGAGAA-3'               |
| shKU70-2                                           | 5'-GAAGATGCCCTTTACTGAA-3'               |
| shSTAT5-1                                          | 5'-GTA CTTCATCATCCAGTAC-3'              |
| shSTAT5-2                                          | 5'-GGAGAACCTCGTGTTCCCTG-3'              |

### **Figure S1. SIRT1 gene expression in cell lines**

Cells were transduced with BCR-ABL vector MIG210 (p210) or empty vector MIG R1 (R1) for 7 days, and harvested for protein analysis.

### **Figure S2. Tyrosine kinase activity in KCL-22 and KCL-22M cells after imatinib treatment**

Cells were treated with indicated concentrations of imatinib for 48 hours, and analyzed for tyrosine phosphorylation by Western blot.

### **Figure S3. Regulation of SIRT1 gene expression**

**(A)** Expression of exogenously introduced SIRT1 was not affected by BCR-ABL knockdown. KCL-22 and K562 cells were stably transduced with empty or SIRT1 expressing vector, followed by mock (SCR) or BCR-ABL knock down (shABL). **(B)** Analysis of SIRT1 mRNA stability. Twelve hours after imatinib treatment, actinomycin D was added and cells were harvested at times indicated following actinomycin D addition. RNA was analyzed by RT-PCR.

### **Figure S4. STAT5 binding sites on SIRT1 promoter**

STAT5 binding sites on SIRT1 promoter between -1484 and -2852 bp. Putative STAT5 binding sites were identified by rVista program (Loots, G.G. & Ovcharenko, I. *Nucleic Acids Res* 2004, **32**: W217-221), and no other STAT members were found in this region. Relative positions for STAT5 and other known transcriptional factor binding sites are shown at the bottom panel.

**Figure S5. Effects of BCR-ABL expression levels on SIRT1 activation in CD34<sup>+</sup> cells**

(A) A representative plot showing flow cytometry sorting of p210 transduced CD34<sup>+</sup> cells. High and low GFP expressing cells were sorted corresponding to high and low BCR-ABL expressing cells, respectively. (B) Effects of BCR-ABL expression levels on several known SIRT1 target genes were analyzed by RT-PCR.

**Figure S6. Effects of sirtinol treatment on cell cycle of CML cell lines**

KCL-22 (A) and K-562 (B) cells were treated with conditions as indicated for two days and cells were labeled with propidium iodide (PI) for cell cycle analysis.

**Figure S7. Effect of graded SIRT1 knockdown on KCL22 cells**

(A) SIRT1 expression level after graded SIRT1 knockdown for 3 days. KCL22 cells were transduced with scrambled shRNA (SCR) or shSIRT1-3 at different MOI of 0.5, 1, 2.5, 5, 10 and 20. (B,C) A substantial level of SIRT1 knockdown was needed to induce apoptosis. Three days after transduction, the cells were mock treated (B) or treated with 2.5  $\mu$ M IM (C) for another 3 days and apoptosis was measured by Annexin-V staining and FACS analysis. MOI of 5 was used in all transduction experiment in the main text unless specified otherwise.

**Figure S8. SIRT1 over-expression protects CML cells from oxidative stress but does not rescue apoptosis induced by BCR-ABL inhibition**

(A) SIRT1 over-expression and imatinib treatment. KCL-22 and K562 cells were stably transduced with SIRT1 (KCL-22SIRT1, K562 SIRT1) over-expressing or empty (KCL-22puro,

K562puro) retroviral vectors. Levels of SIRT1 over-expression were shown in Supplemental Figure 1b. Transduced cells were then treated with indicated concentrations of imatinib (IM) for 48h. Apoptosis was analyzed by flow cytometry and the percentage of annexin V<sup>+</sup> cells was plotted. **(B)** SIRT1 over-expression and BCR-ABL knockdown. BCR-ABL was knocked down by shABL lentiviral vector in control (puro vector) or SIRT1 over-expressing cells, shown in A. Apoptosis was analyzed at day 4 and 5 after shABL transduction. **(C)** SIRT1 over-expression protected CML cells from oxidative stress. Control or SIRT1 over-expressing CML cells were treated with H<sub>2</sub>O<sub>2</sub> for 22h, and analyzed for apoptosis by flow cytometry.

**Figure S9. Effects of SIRT1 knockout on functions of mouse hematopoietic progenitor cells and lineage differentiation**

**(A)** Colony formation assay. Bone marrow cells from three-month old wild type (WT) and SIRT1 knockout (KO) mice were plated with methylcellulose medium and colonies were scored after two weeks. **(B, C)** Analysis of hematopoietic stem cell frequency and cell cycle. Hematopoietic stem cells were identified by SLAM markers using Lin<sup>-</sup>CD150<sup>+</sup>CD41<sup>-</sup>CD48<sup>-</sup> combination in BABL/c strain **(B)**. Hematopoietic stem cells were further analyzed for cell cycle status using Hoechst 33342 and pyronin Y staining **(C)**. n=3 each genotype. **(D)** Comparison of blood lineage cells in wild type and knockout mice. n=3 each genotype.

**Figure S10. Effects of SIRT1 knockout in transplantation recipients**

**(A,B)** Similar transduction and engraftment efficiency was observed for SIRT1<sup>+/+</sup> and SIRT1<sup>-/-</sup> bone marrow cells transduced by the MIG R1 vector. Peripheral blood mononuclear cells were analyzed for GFP expression 30 days **(A)** and 60 days **(B)** after transplantation. **(C)** Blood cell

counts of recipients mice two months after transplantation of wild type or knockout bone marrow cells (2.5 million each) without gene transduction.

### **Figure S11. Effects of SIRT1 knockout on CML progression**

**(A)** Survival curves for mice receiving  $1.0 \times 10^5$  mononuclear cells transduced by BCR-ABL MIG210 vector (p210) or empty vector (R1). The experiment was performed as described in Figure 6A. **(B)** Comparison of blood smear of mice receiving BCR-ABL transduced wild type or SIRT1 knockout cells.

### **Figure S12. Effect of SIRT1 knockout on FOXO1 acetylation of mouse bone marrow progenitor cells**

$\text{Lin}^{\text{lo/-}}$  bone marrow progenitor cells were enriched by depleting the lineage positive cells with lineage antibody cocktail-conjugated magnetic beads using EasySep. Cells were fixed by paraformaldehyde for 10 min, and stained with APC-labeled anti-CD150 antibody. After permeabilization with Triton X-100, cells were stained with acetylated-FOXO1 antibody followed by Alexa 680-conjugated second antibody, and analyzed by FACS. Individual labeling panels and overlay for comparison were shown in A and B respectively.

### **Figure S13. Representative sorting schemes for LSK cell from Taconic BALB/c bone marrow cells**

The top four plots showed unlabeled cells, isotype control labelling, and single label of Sca-1 or c-Kit in bone marrow mononuclear cells. The bottom two plots showed Sca-1 and c-Kit labeling in  $\text{Lin}^-$  gated cells: normal (left) and BCR-ABL transduced  $\text{GFP}^+$  cells (right). The rate of  $\text{Sca-1}^+$

cells (about 2%) in Lin<sup>-</sup> population in this study was higher than 0.29% previously reported for Jackson BALB/c strain (Spangrude, G.J. and Brooks D. *Blood*, 1993: 82:3327-3332). However, Taconic BALB/c strain is known to have higher level of Sca-1<sup>+</sup> cells (Jurecic, R. et al. *Blood*, 1993: 82: 2673-2683).

#### **Figure S14. SIRT1 expression in KRAS transformation**

**(A)** KRAS transduction of mouse bone marrow cells increased SIRT1 expression. Mouse bone marrow cells were transduced with two rounds of infection with KRAS retroviral vector. Mononuclear cells were then harvested for analysis. Background SIRT1 level was elevated in these cultured mouse bone marrow cells likely due to the use of growth factor cocktails including IL3 and SCF that have been shown to increase STAT5 phosphorylation (Yamada, Y., *et al. Blood* 2008; **112**, 2500-2507 and Jiang, X., et al. *Proc Natl Acad Sci U S A* 1999; **96**, 12804-12809). Constitutive KRAS expression further increased SIRT1 level. **(B)** KRAS transduction did not increase SIRT1 expression in NIH-3T3 cells. NIH-3T3 cells were transduced with empty vector (neo) or KRAS expressing vector, and selected for neomycin resistance. After recovery in drug free medium, cells were then analyzed for SIRT1 expression (Left panel) and plated for soft agar colony formation (Right panel). SIRT1 level remained unchanged in spite of effective transformation.

#### **Figure S15. Effects of tenovin-6 and imatinib treatment on physiological indexes**

Normal BALB/c mice were subjected to the same 10 day treatment with vehicle, imatinib, tenovin-6 or combination as described in Figure 7A and B. Body weight (A) was monitored during drug treatment, and total leukocyte and erythrocyte counts (B) were analyzed at day 16.

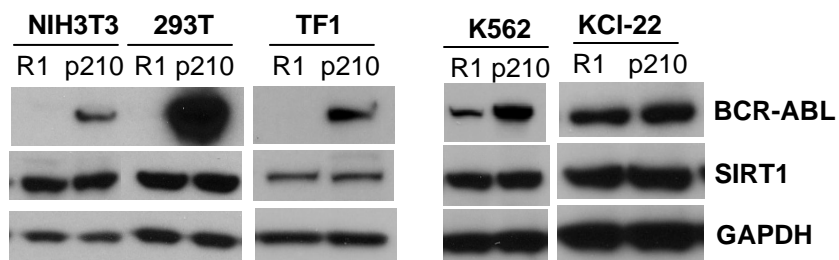

**Figure S1**

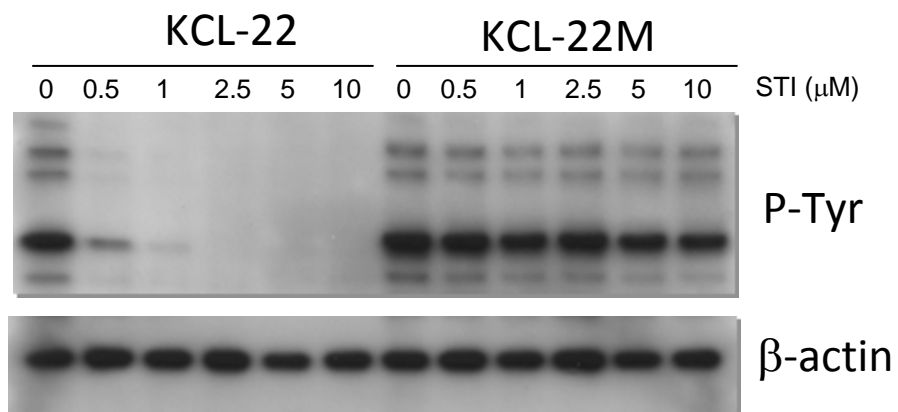

**Figure S2**



**A**

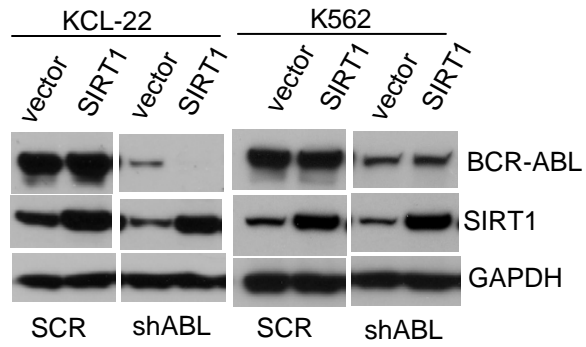

**B**

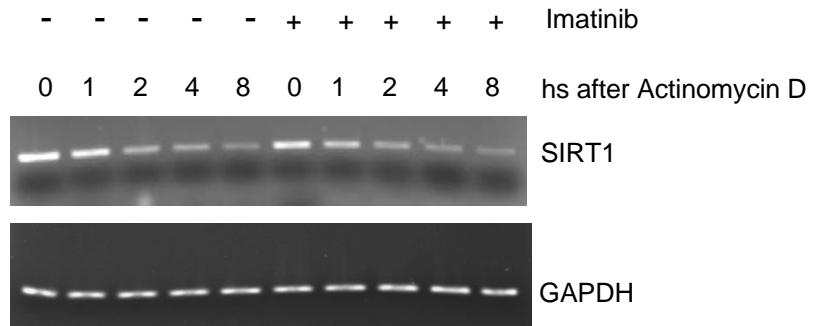

**Figure S3**

multTF :: TFBS in the alignment

```

*****
hg19_xenoRefGen CATCTCTGACCTCTCAGCATACTAACAAATAATATTGATCACATAAGCTTTCGTTGT-2235
hg19_refGene_NM  CATCTCTGACCTCTCAGCATACTAACAAATAATATTGATCACATAGCAATTTCGTTGTGTC 2760
*****

hg19_xenoRefGen ATAAACTTCACGTGTCATAATATACTATAAAATATAAAATGAATTAATGAACAACAGGATG
hg19_refGene_NM  ATAAACTTCACGTGTCATAATATACTATAAAATATAAAATGAATTAATGAACAACAGGATG 2820
*****

hg19_xenoRefGen CTCATAAGCTTACAGACATCTTTTTCTCAAAAAGCTGGGAATTTGTCTGTTTTATT
hg19_refGene_NM  CTCATAAGCTTACAGACATCTTTTTCTCAAAAAGCTGGGAATTTGTCTGTTTTATT 2880
*****

hg19_xenoRefGen GGGATACTGACTCTCAACATTTTCATATATTGCATTCCACCAACGTAGCTGAGAGTCAATT
hg19_refGene_NM  GGGATACTGACTCTCAACATTTTCATATATTGCATTCCACCAACGTAGCTGAGAGTCAATT 2940
*****

hg19_xenoRefGen TATGAAATATTTTGTAGTGTAAAGACAGAAAGTGGGAGGACCAAGTATGTCAACCACTAG
hg19_refGene_NM  TATGAAATATTTTGTAGTGTAAAGACAGAAAGTGGGAGGACCAAGTATGTCAACCACTAG 3000
*****

hg19_xenoRefGen GAGTGTGGTGCCTAGTCAGGAATTGGGAGGAGTGTAGCAAGAAAGGAAGGACAACAGGAT
hg19_refGene_NM  GAGTGTGGTGCCTAGTCAGGAATTGGGAGGAGTGTAGCAAGAAAGGAAGGACAACAGGAT 3060
*****

hg19_xenoRefGen TTGGTCATTGATTGGTCAGATGGATTTTCAGAGGGATTGGTATGAAGGAACGCTTCAAAGA
hg19_refGene_NM  TTGGTCATTGATTGGTCAGATGGATTTTCAGAGGGATTGGTATGAAGGAACGCTTCAAAGA 3120
*****

hg19_xenoRefGen TTTTTTTTTTAATTTAGTTCAGGATAGGTTGCAGAAATGTGTAGGTTTGTACATACT
hg19_refGene_NM  TTTTTTTTTTAATTTAGTTCAGGATAGGTTGCAGAAATGTGTAGGTTTGTACATACT 3180
*****

hg19_xenoRefGen TATAGGTGAGCCATGGTGGTTTGGCTGCACCAATCAACCCCTCATCTAGGTTTTATTATA
hg19_refGene_NM  TATAGGTGAGCCATGGTGGTTTGGCTGCACCAATCAACCCCTCATCTAGGTTTTATTATA 3240
*****

```

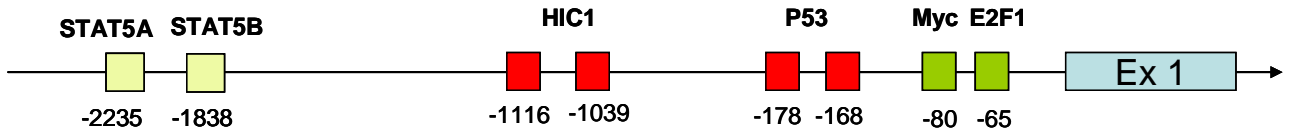

Figure S4

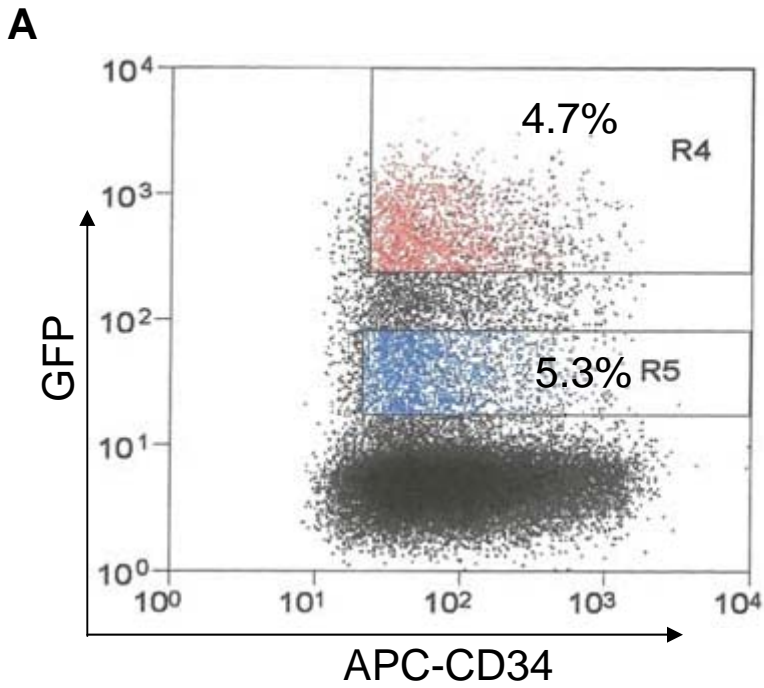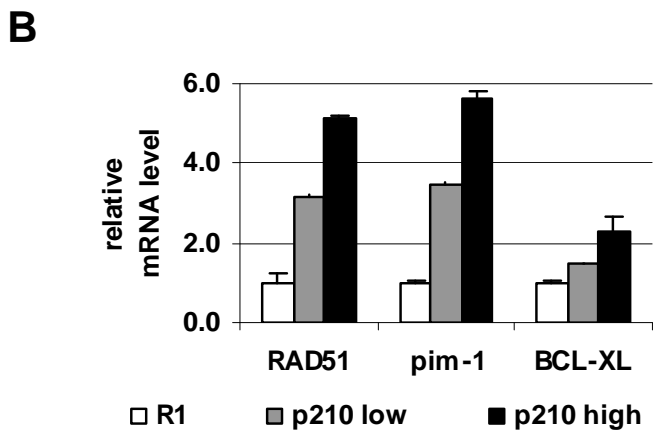

**Figure S5**

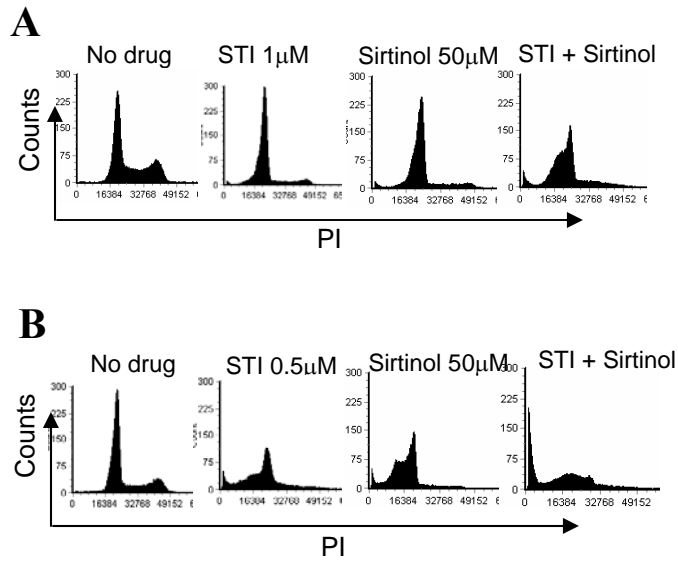

**Figure S6**

**A**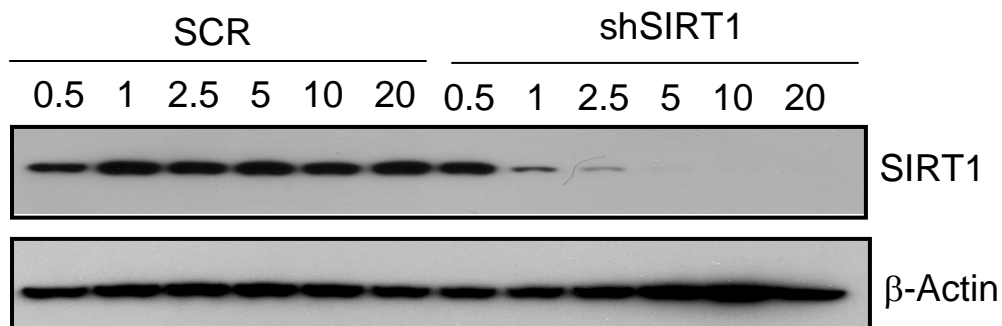**B**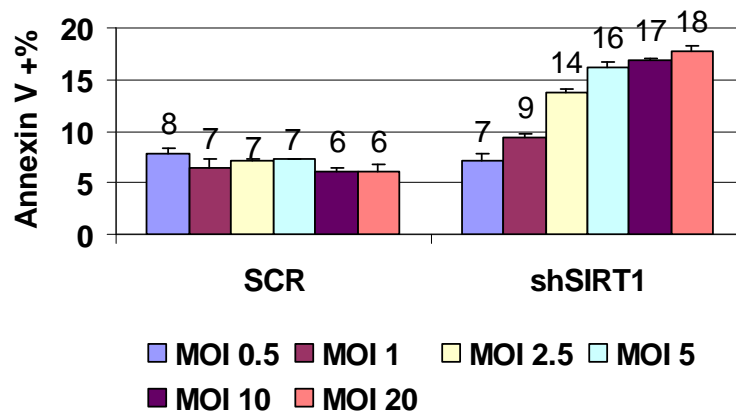**C**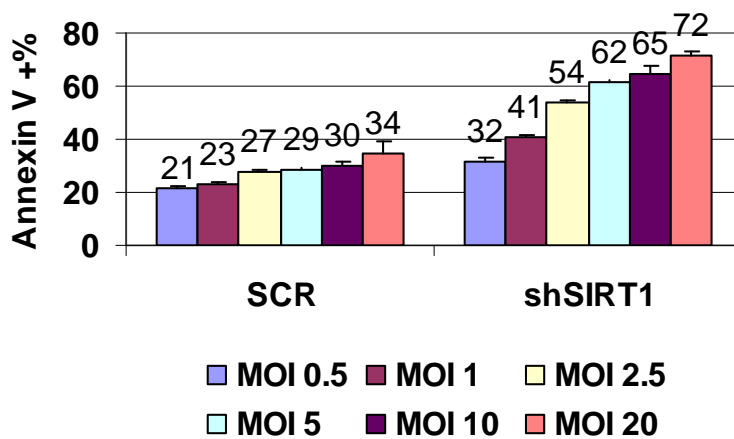**Figure S7**

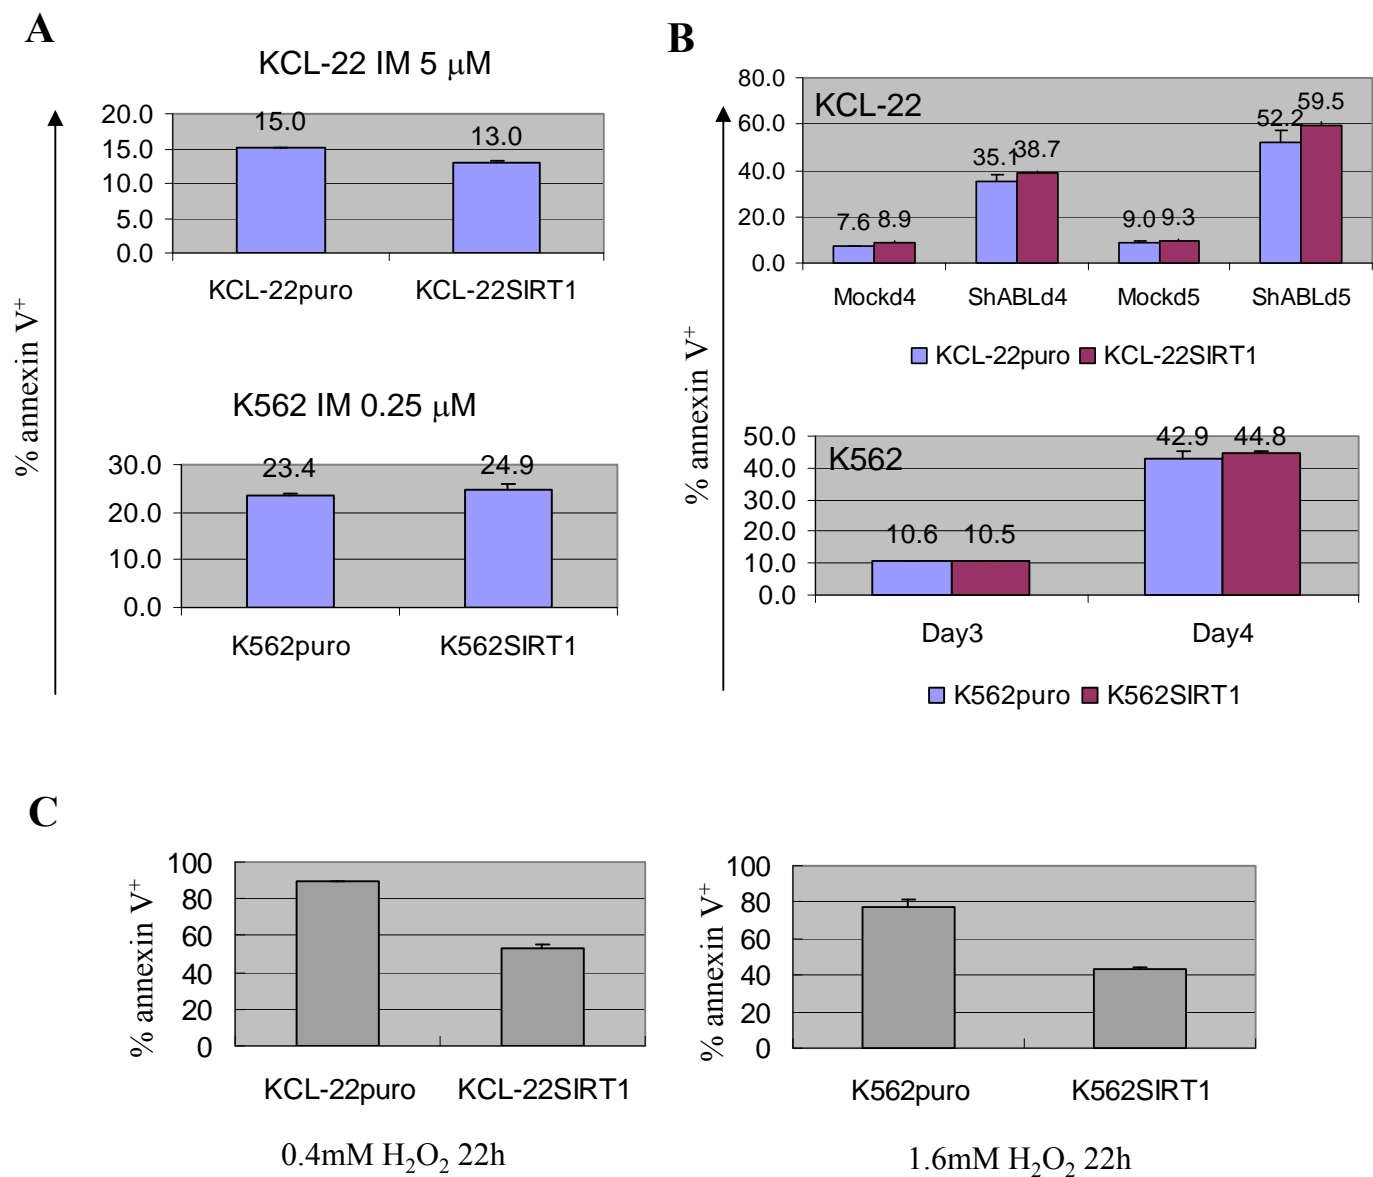

**Figure S8**

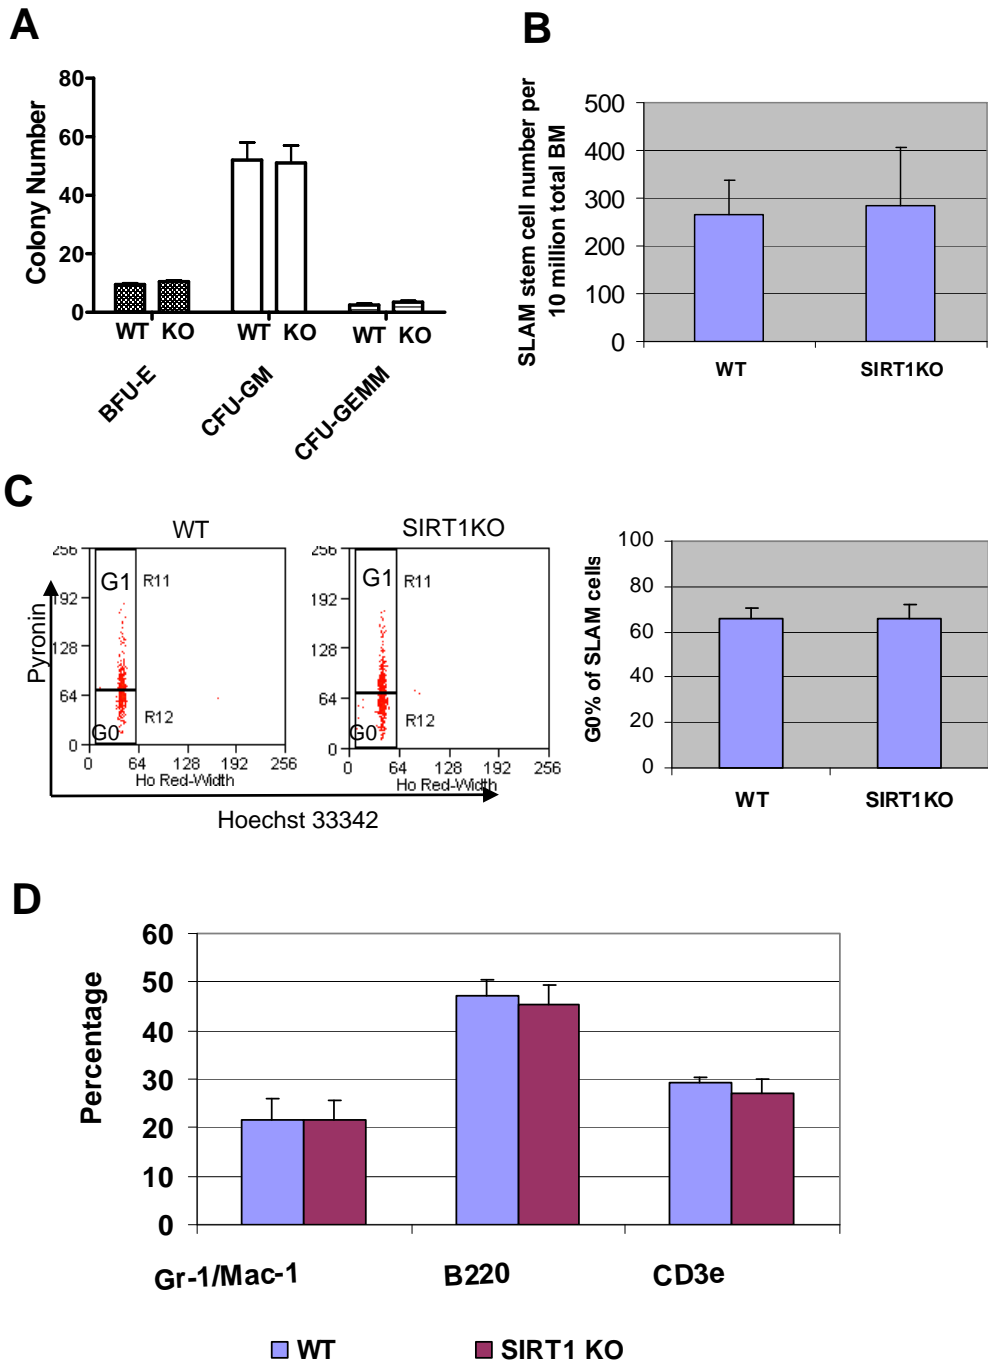

**Figure S9**

**A**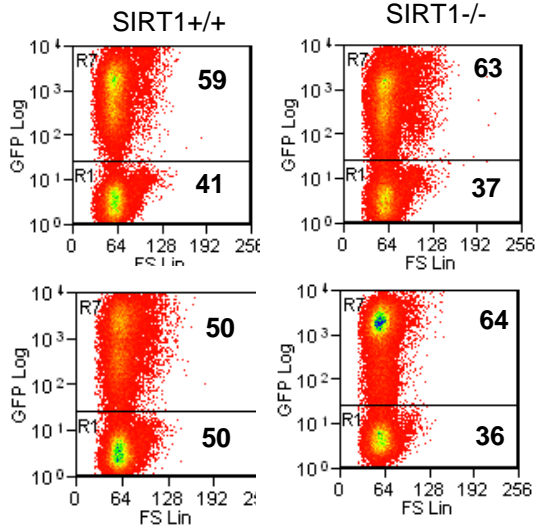**B**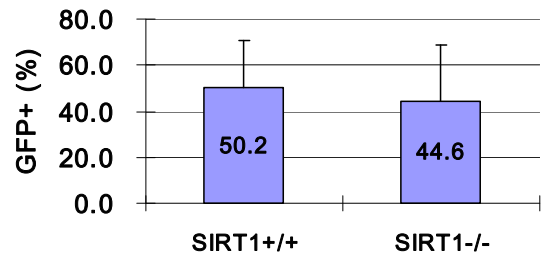**C**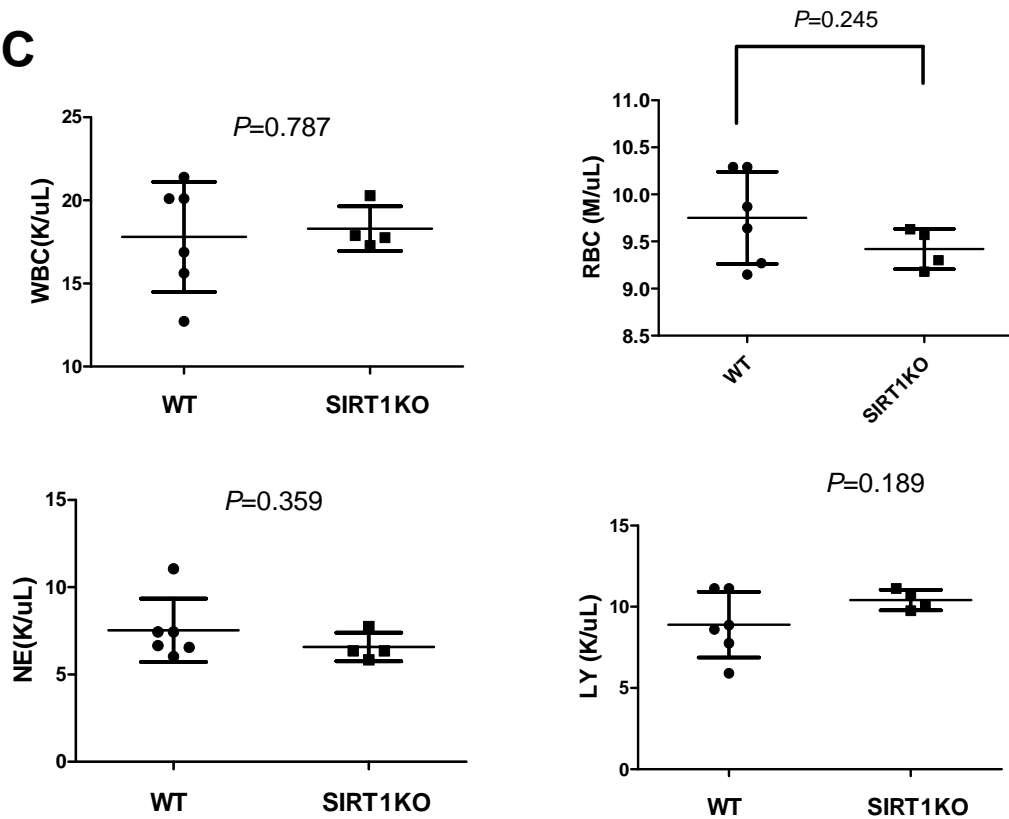**Figure S10**



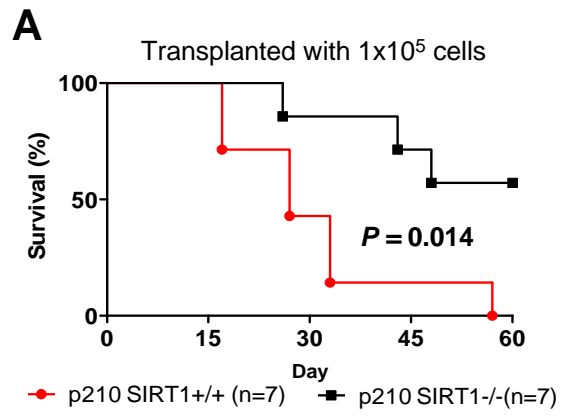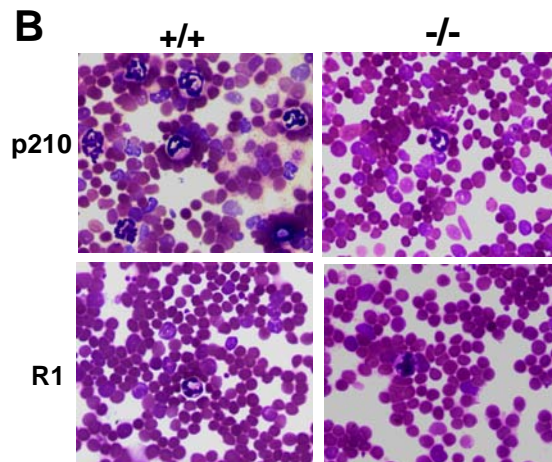

**Figure S11**

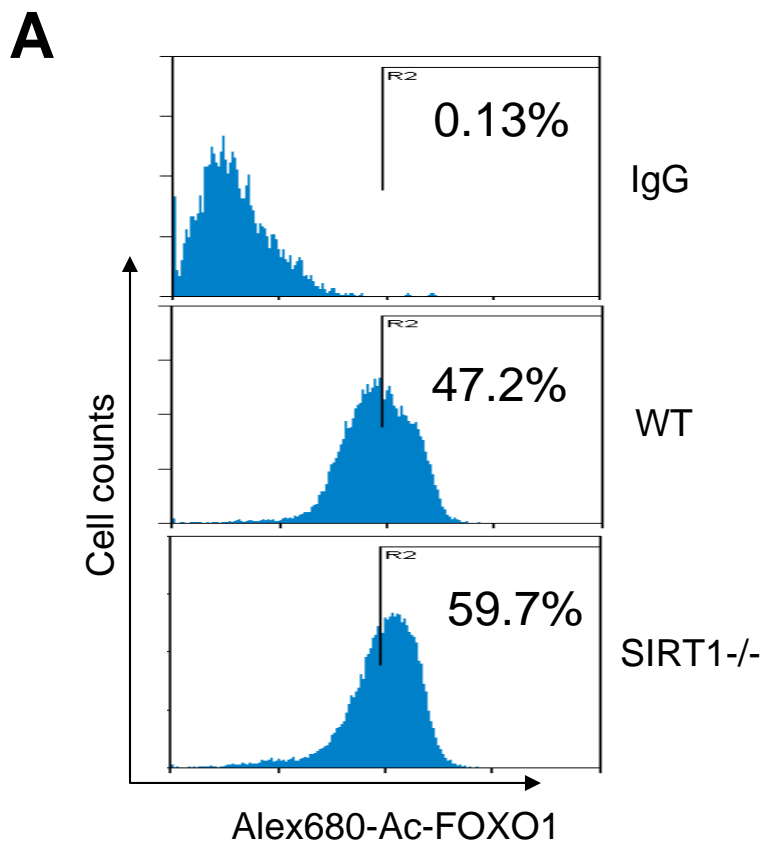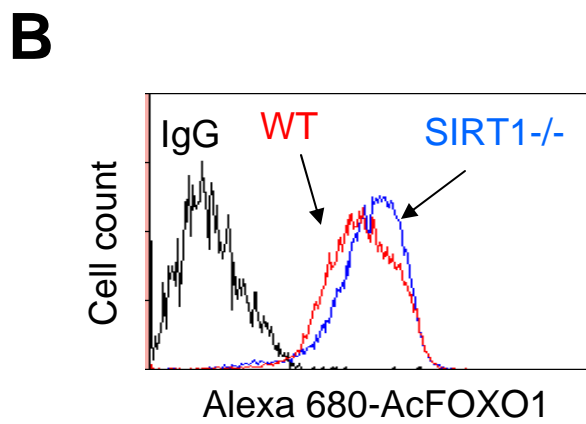

**Figure S12**

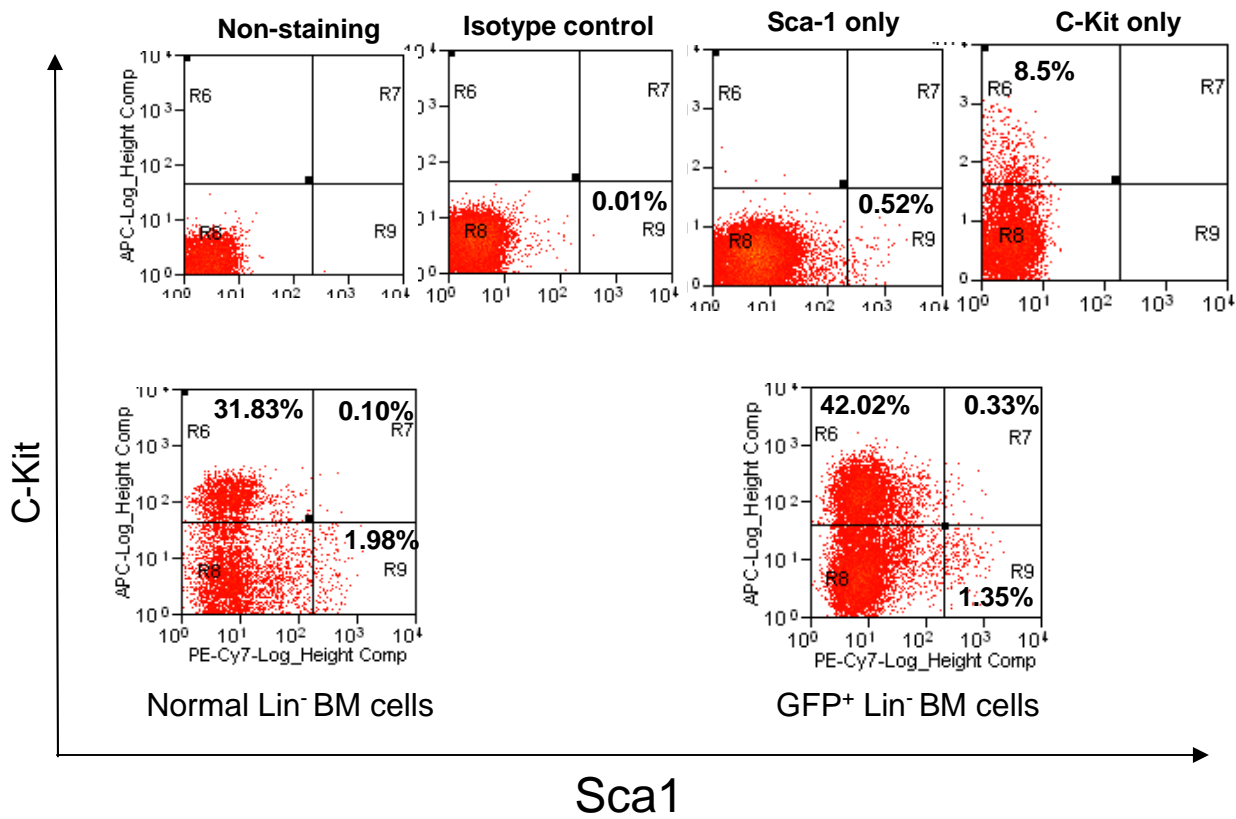

**Figure S13**

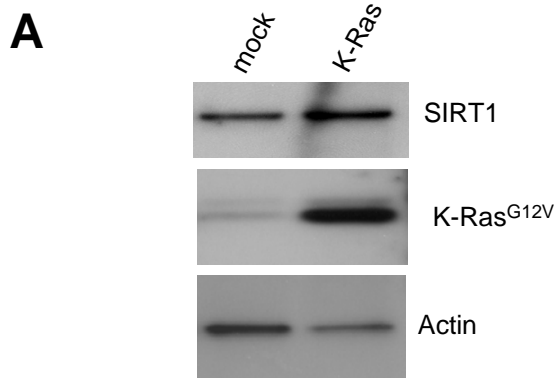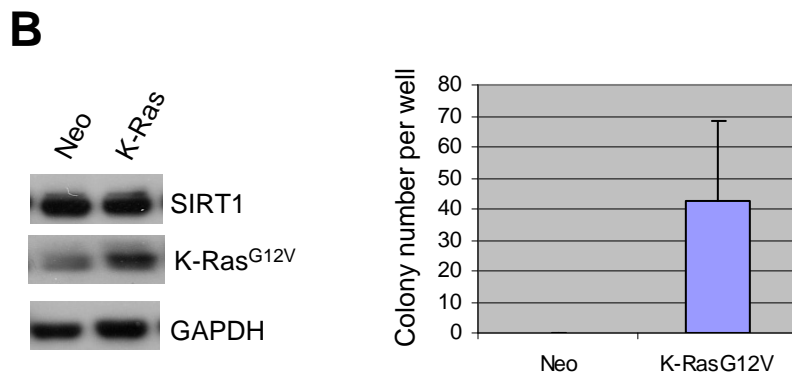

**Figure S14**

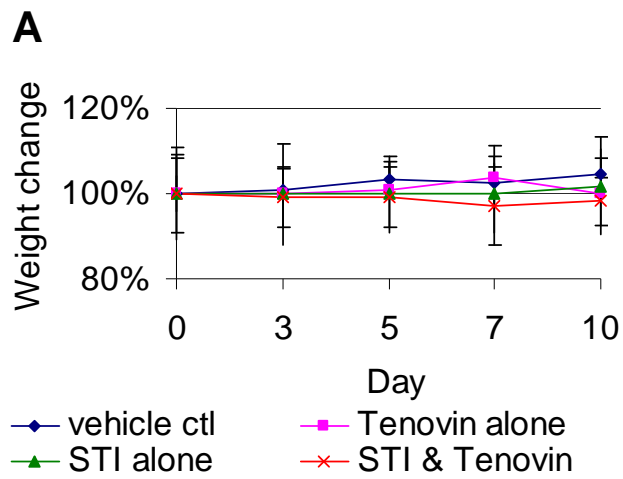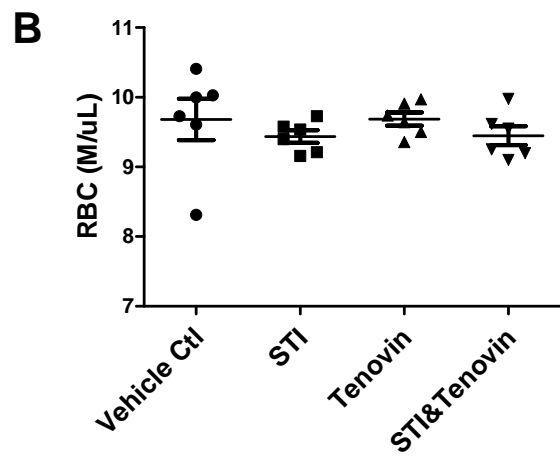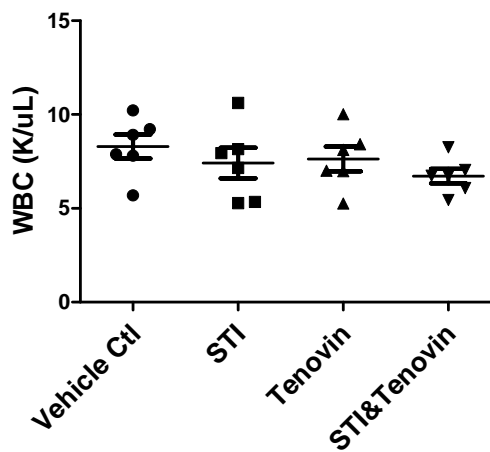

**Figure S15**
